# Supplementary material for: Patients’ Perceived Importance of Medication and Adherence in Polypharmacy, a Quantitative, Cross-Sectional Study Using a Questionnaire Administered in Three Doctors’ Private Practices in France
Source: PubMed Central journal article supplement — Drugs Real World Outcomes. 2023 Mar 30;10(2):309–20. doi: 10.1007/s40801-023-00361-7 (PMC10232699; doi:10.1007/s40801-023-00361-7), 2023-03-30

## **DRUGS REAL WORLD OUTCOME (DRWO)**

**Patients' perceived importance of medication and adherence in polypharmacy, a quantitative, cross-sectional study using a questionnaire administered in three doctors' private practices in France**

Gérard Reach<sup>1</sup>

Aurélie Calvez<sup>2</sup>

Nanthara Sritharan<sup>3</sup>

Marouane Boubaya<sup>3</sup>

Vincent Lévy<sup>3</sup>

Stéphanie Sidorkiewicz<sup>4,5</sup>

May Fiani<sup>1,2</sup>

<sup>1</sup> Health Education and Promotion Laboratory (LEPS UR 3412), University, Sorbonne Paris Nord University, Bobigny, France

<sup>2</sup> Department of General Practice, University of Picardy Jules Verne, Amiens, France

<sup>3</sup> Department of Clinical Research, CHU Avicenne, APHP, Bobigny, France

<sup>4</sup> University of Paris Cité, Department of General Medicine, F-75014 Paris, France

<sup>5</sup> University of Paris Cité, Centre of Research in Epidemiology and Statistics

Sorbonne Paris Cité (CRESS), INSERM, UMR 1153, F-75004 Paris

## APPENDIX 1: Questionnaire

### Part 1: Sociodemographic data

You are:  a woman  a man

Your age: .....

Your socioprofessional category:

farmer  craftsman, shopkeeper and company manager  executive, higher intellectual profession  intermediate profession (teacher, nurse, social worker)  employee

worker  retired  no professional activity

### Part 2: Girerd adherence questionnaire

Regarding treatments:

1) This morning, did you forget to take your treatment?  yes  no

2) Since the last consultation, have you run out of medication?  yes  no

3) Have you ever been late in taking your medication compared with the usual time?  
 yes  no

4) Have you ever not taken your medication because on some days, your memory fails you?  yes  no

5) Have you ever not taken your treatment because some days, you feel that your treatment is doing you more harm than good?  yes  no

6) Do you think you have too many tablets to take?  yes  no

### 3. Part 3: Adherence by medication

NAME OF MEDICATION: .....

1. Have you permanently stopped taking this medication? Yes  No

2. If you have to take this medication several times a day, do you routinely skip one of the daily doses? Yes  No

3. Do you ever miss taking this medication several days in a row?  
(forget, want to take a break, holiday, weekend, travel...)

No, never or 1 day maximum

Yes, sometimes 2–3 days in a row

Yes, sometimes 6–7 days in a row or more

4. Do you ever skip a dose of this medication from time to time?  
(forget to take it, don't feel like taking it...)

No, never

Yes, once or twice a month

Yes, once a week or more

5. Do you ever take your medication late compared with the usual time? (tick the box that is closest to you)

Yes, I sometimes delay by 12 hours or more

Yes, I sometimes delay by 4 hours or more

No, I take this medication at about the same time

6. How long have you been taking this medication?

Less than 6 months  Between 6 months and a year  More than a year

#### Part 4

1. How important is this medication to your health? Put a cross where you would place this medication.

Not important at all    Essential

2. For what reason(s) do you sometimes skip one or more doses of medication or stop taking it at all? (Several answers possible)

- 2.1. I don't feel like taking this medication
  - 2.2. To make it fit better with my needs, my agenda
  - 2.3. Because I have side effects with it or I'm afraid to have them
  - 2.4. Because I think I have too much
  - 2.5. When I feel better or on the contrary, worse
  - 2.6. I sometimes forget to take it
  - 2.7. I sometimes forget to refill my prescription on time
  - 2.8. I don't think this medication is useful
  - 2.9. In order for the treatment to last longer
  - 2.10. Because I was distracted/busy when I usually took it
  - 2.11. Because I was advised against it by someone close to me or by an article I read
  - 2.12. I don't know
  - Other answer(s):
- 

3. Do you agree or disagree with the following sentence: Taking my medication is something I do automatically.

- agree     disagree

## Appendix 2: Calculation of adherence scores

| Score                                 | Questionnaire used                                       | Score range                                 | Score quotation                                                                                                                                                                                                                                                                                                                                                                                                                                                                                                                                                                                                                                          |
|---------------------------------------|----------------------------------------------------------|---------------------------------------------|----------------------------------------------------------------------------------------------------------------------------------------------------------------------------------------------------------------------------------------------------------------------------------------------------------------------------------------------------------------------------------------------------------------------------------------------------------------------------------------------------------------------------------------------------------------------------------------------------------------------------------------------------------|
| General adherence score <sup>21</sup> | Girerd adherence questionnaire in part 2 (Questions 1–6) | 0 [poor adherence] to 6 [perfect adherence] | <p>Score calculated by summing the positive responses</p> <p>Score 0 (poor adherence): 6 positive responses<br/>           Score 1 (poor adherence): 5 positive responses<br/>           Score 2 (poor adherence): 4 positive responses<br/>           Score 3 (poor adherence): 3 positive responses<br/>           Score 4 (moderate adherence): 2 positive responses<br/>           Score 5 (moderate adherence): 1 positive response<br/>           Score 6 (perfect adherence): 0 positive response</p> <p><i>The score has been inverted compared to the original version (0 means the best adherence, and 6, the poorest adherence score)</i></p> |

|                                                                              |                                                                            |                                                        |                                                                                                                                                                                                                                                                                                                                                                                                                                                                                                                                                                                                                                                                                                                                                                                                                                                                                                                                                                                                                                                                                                                                                                                                               |
|------------------------------------------------------------------------------|----------------------------------------------------------------------------|--------------------------------------------------------|---------------------------------------------------------------------------------------------------------------------------------------------------------------------------------------------------------------------------------------------------------------------------------------------------------------------------------------------------------------------------------------------------------------------------------------------------------------------------------------------------------------------------------------------------------------------------------------------------------------------------------------------------------------------------------------------------------------------------------------------------------------------------------------------------------------------------------------------------------------------------------------------------------------------------------------------------------------------------------------------------------------------------------------------------------------------------------------------------------------------------------------------------------------------------------------------------------------|
| <p>Medication-by-medication adherence score<br/>(score used in Figure 1)</p> | <p>Adherence by medication questionnaire in part 3<br/>(Questions 1–5)</p> | <p>1 [medication stopped] to 6 [perfect adherence]</p> | <p>Score 1 (poor adherence/stopping the medication): answer “Yes” to the question 1.</p> <p>Score 2 (very poor adherence): answer “Yes” to the question 2 and/or answer “Yes, sometimes 6–7 days in a row or more” to the question 3.</p> <p>Score 3 (poor adherence): answer “Yes, sometimes 2–3 days in a row” to the question 3 and/or answer “Yes, once a week or more” to the question 4.</p> <p>Score 4 (average adherence): answer “No, never or 1 day maximum” to the question 3 and answer “Yes, once or twice a month” to the question 4 and/or answer “Yes, I sometimes delay by 12 hours or more” to the question 5.</p> <p>Score 5 (good adherence): answer “No, never or 1 day maximum” to the question 3 and answer “No, never” to the question 4 and answer “Yes, I sometimes delay by 4 hours or more” to the question 5.</p> <p>Score 6 (perfect adherence): answer “No, never or 1 day maximum” to the question 3, answer “No, never” to the question 4, and answer “No, I take this medication at about the same time” to the question 5.</p> <p><i>The score has been inverted compared to the original version (1 means the best adherence, and 6, the poorest adherence score)</i></p> |
|------------------------------------------------------------------------------|----------------------------------------------------------------------------|--------------------------------------------------------|---------------------------------------------------------------------------------------------------------------------------------------------------------------------------------------------------------------------------------------------------------------------------------------------------------------------------------------------------------------------------------------------------------------------------------------------------------------------------------------------------------------------------------------------------------------------------------------------------------------------------------------------------------------------------------------------------------------------------------------------------------------------------------------------------------------------------------------------------------------------------------------------------------------------------------------------------------------------------------------------------------------------------------------------------------------------------------------------------------------------------------------------------------------------------------------------------------------|

|                                         |                                                        |                                                    |                                                                                                                                                                                                                                                                                                                                                                                                                                 |
|-----------------------------------------|--------------------------------------------------------|----------------------------------------------------|---------------------------------------------------------------------------------------------------------------------------------------------------------------------------------------------------------------------------------------------------------------------------------------------------------------------------------------------------------------------------------------------------------------------------------|
| <p>Intentional nonadherence score</p>   | <p>Questions 2.1–2.5, 2.8, 2.9, and 2.11 in part 4</p> | <p>0 [perfect adherence] to 8 [poor adherence]</p> | <p>Score calculated by summing the number of answers ticked among the 8 answers<br/> Score 0 (perfect adherence): 0/8 answer ticked<br/> Score 1: 1/8 answer ticked<br/> Score 2: 2/8 answers ticked<br/> Score 3: 3/8 answers ticked<br/> Score 4: 4/8 answers ticked<br/> Score 5: 5/8 answers ticked<br/> Score 6: 6/8 answers ticked<br/> Score 7: 7/8 answers ticked<br/> Score 8 (poor adherence): 8/8 answers ticked</p> |
| <p>Unintentional nonadherence score</p> | <p>Questions 2.6, 2.7, and 2.10 in part 4</p>          | <p>0 [perfect adherence] to 3 [poor adherence]</p> | <p>Score calculated by summing the number of answers ticked among the 3 answers<br/><br/> Score 0 (perfect adherence): 0/3 answer ticked<br/> Score 1: 1/3 answer ticked<br/> Score 2: 2/3 answers ticked<br/> Score 3 (poor adherence): 3/3 answers ticked</p>                                                                                                                                                                 |

|                                                                                                     |                                     |                                                    |                                                                                                                                                                                                                                                                                                                                                                                                                                                                                                                                                                                                                                                                                                                                                                                                                                                                                                                                                                                                                                                                                                            |
|-----------------------------------------------------------------------------------------------------|-------------------------------------|----------------------------------------------------|------------------------------------------------------------------------------------------------------------------------------------------------------------------------------------------------------------------------------------------------------------------------------------------------------------------------------------------------------------------------------------------------------------------------------------------------------------------------------------------------------------------------------------------------------------------------------------------------------------------------------------------------------------------------------------------------------------------------------------------------------------------------------------------------------------------------------------------------------------------------------------------------------------------------------------------------------------------------------------------------------------------------------------------------------------------------------------------------------------|
| <p>Lumped adherence score calculated from the intentional and unintentional nonadherence scores</p> | <p>Questions 2.1–2.10 in part 4</p> | <p>1 [poor adherence] to 4 [perfect adherence]</p> | <p>Score calculated by combining intentional and unintentional nonadherence score calculated just above (sum of number of answers ticked).</p> <p>Score 1 (very poorly adherence): intentional and unintentional nonadherence scores &gt; 0 (at least 1/8 answer ticked for intentional nonadherence score (score 1 to 8) and 1/3 for unintentional nonadherence score (score 1 to 3))</p> <p>Score 2 (poorly adherence): intentional nonadherence score of 0 and unintentional score &gt;0 (0/8 answer ticked for intentional nonadherence score (score 0) and at least 1/3 for unintentional nonadherence score (score 1 to 3))</p> <p>Score 3 (moderately adherence): intentional nonadherence score &gt;0 and an unintentional score of 0 (at least 1/8 answer ticked for intentional nonadherence score (score 1 to 8) and 0/3 for unintentional nonadherence score (score 0))</p> <p>Score 4 (perfect adherence): intentional and unintentional nonadherence scores of 0 (0/8 answer ticked for intentional nonadherence score (score 0) and 0/3 for unintentional nonadherence score (score 0))</p> |
|-----------------------------------------------------------------------------------------------------|-------------------------------------|----------------------------------------------------|------------------------------------------------------------------------------------------------------------------------------------------------------------------------------------------------------------------------------------------------------------------------------------------------------------------------------------------------------------------------------------------------------------------------------------------------------------------------------------------------------------------------------------------------------------------------------------------------------------------------------------------------------------------------------------------------------------------------------------------------------------------------------------------------------------------------------------------------------------------------------------------------------------------------------------------------------------------------------------------------------------------------------------------------------------------------------------------------------------|

**Summary diagram of the lumped score**

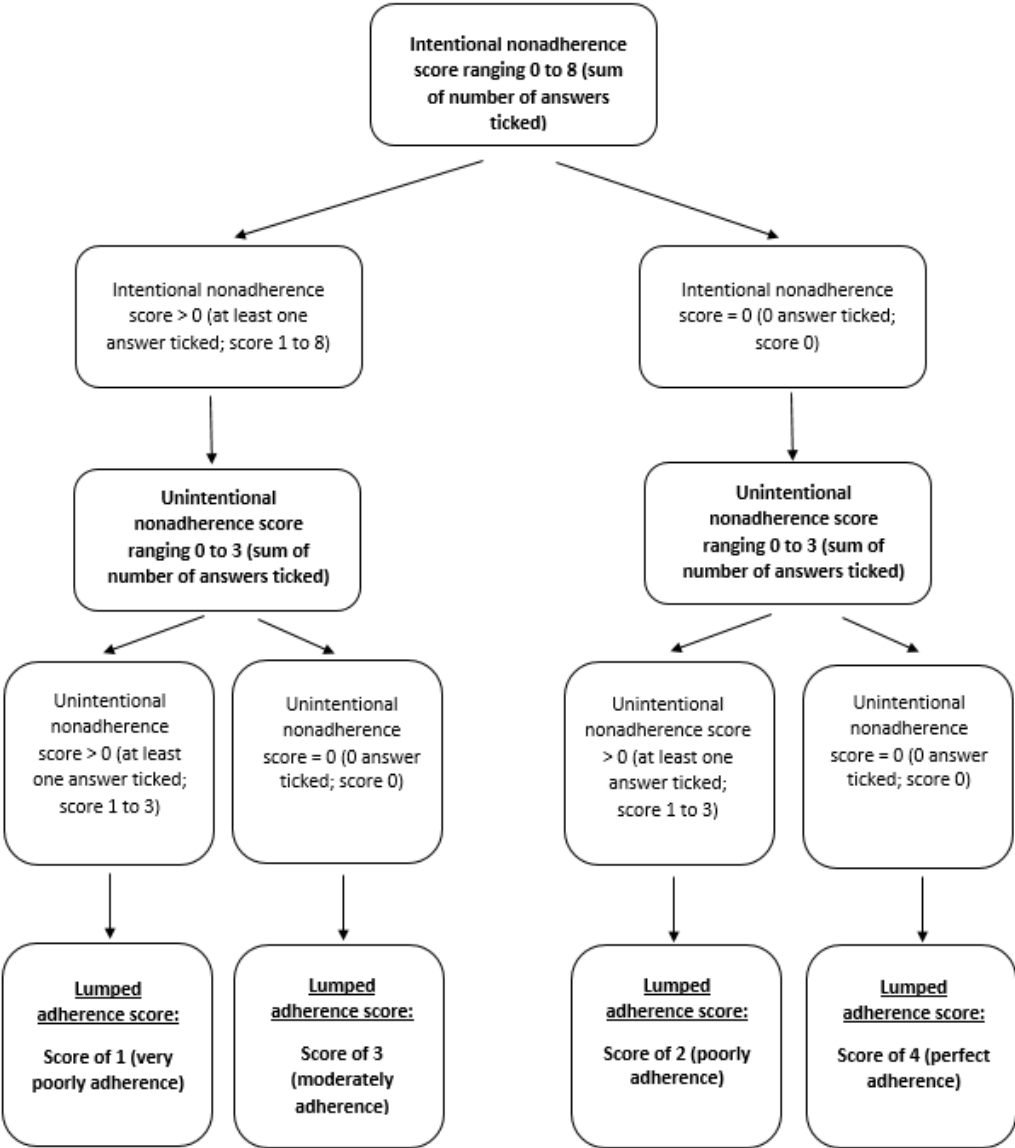

Supplement: 40801_2023_361_MOESM1_ESM.pdf [file 40801_2023_361_MOESM1_ESM.pdf]
